# Supplementary material for: Arsenic exposure and intestinal microbiota in children from Sirajdikhan, Bangladesh
Source: PLoS One. 2017 Dec 6;12(12):e0188487. doi: 10.1371/journal.pone.0188487 (PMC5718612; doi:10.1371/journal.pone.0188487)
Supplement: S2 Table — (XLSX) [file pone.0188487.s012.xlsx]

## Sheet: Sheet1
S2 Table. Bacterial genes with concordant changes between High/Low arsenic exposure and correlation to arsenic levels in high group.
Parametric p-value.fold change	FDR	fold change high/low	UniqueID	correlation. Spearman	one sided pvalue spearman	fisher statistics	combinedP	combined FDR
0.082965	0.591	1.39	SEED;Regulation and Cell signaling;cAMP_signaling_in_bacteria;Adenylate/guanylate cyclase (EC 4.6.1.2);Adenylate/guanylate cyclase (EC 4.6.1.2)	0.266	0.0988711	9.60655	0.0476033	0.0477472
0.0974465	0.598	1.49	SEED;Metabolism of Aromatic Compounds;Peripheral pathways for catabolism of aromatic compounds;p-Hydroxybenzoate_degradation;P-hydroxybenzoate hydroxylase (EC 1.14.13.2);P-hydroxybenzoate hydroxylase (EC 1.14.13.2)	0.284	0.083757	9.61657	0.0474062	0.0476935
0.0992151	0.602	2.67	SEED;Carbohydrates;Organic acids;Lactate_utilization;D-Lactate dehydrogenase (EC 1.1.2.5);D-Lactate dehydrogenase (EC 1.1.2.5)	0.288	0.0808282	9.65179	0.04672	0.047146
0.0874568	0.591	2.69	SEED;Respiration;Electron accepting reactions;Terminal_cytochrome_oxidases;Cytochrome O ubiquinol oxidase subunit II (EC 1.10.3.-);Cytochrome O ubiquinol oxidase subunit II (EC 1.10.3.-)	0.276	0.0904653	9.6788	0.0462002	0.0467636
0.0874568	0.591	2.69	SEED;Respiration;Electron accepting reactions;Terminal_cytochrome_O_ubiquinol_oxidase;Cytochrome O ubiquinol oxidase subunit II (EC 1.10.3.-);Cytochrome O ubiquinol oxidase subunit II (EC 1.10.3.-)	0.276	0.0904653	9.6788	0.0462002	0.0467636
0.097454	0.598	2.31	SEED;DNA Metabolism;DNA repair;2-phosphoglycolate_salvage;Putative phosphatase YieH;Putative phosphatase YieH	0.291	0.0785385	9.74508	0.0449478	0.045775
0.0849279	0.591	2.57	SEED;Amino Acids and Derivatives;Aromatic amino acids and derivatives;Aromatic_amino_acid_degradation;Aromatic ring-opening dioxygenase;Aromatic ring-opening dioxygenase	0.279	0.0879835	9.79312	0.0440606	0.0450096
0.0814059	0.591	2.36	SEED;Protein Metabolism;Protein biosynthesis;Ribosome_biogenesis_bacterial;Ribosomal protein S6 glutaminyl transferase;Ribosomal protein S6 glutaminyl transferase	0.28	0.0873706	9.89181	0.0422902	0.0433344
0.0716661	0.591	3.11	SEED;Regulation and Cell signaling;Orphan_regulatory_proteins;Glycine cleavage system transcriptional antiactivator GcvR;Glycine cleavage system transcriptional antiactivator GcvR	0.267	0.0975438	9.92638	0.0416862	0.0428477
0.0716661	0.591	3.11	SEED;Amino Acids and Derivatives;Alanine, serine, and glycine;Glycine_cleavage_system;Glycine cleavage system transcriptional antiactivator GcvR;Glycine cleavage system transcriptional antiactivator GcvR	0.267	0.0975438	9.92638	0.0416862	0.0428477
0.08249	0.591	1.72	SEED;Regulation and Cell signaling;cAMP_signaling_in_bacteria;Adenylate cyclase (EC 4.6.1.1);Adenylate cyclase (EC 4.6.1.1)	0.286	0.0825765	9.97822	0.0407962	0.0421942
0.0797739	0.591	2.49	SEED;RNA Metabolism;Transcription;Transcription_initiation,_bacterial_sigma_factors;Sigma factor RpoE negative regulatory protein RseB precursor;Sigma factor RpoE negative regulatory protein RseB precursor	0.286	0.0831653	10.031	0.0399092	0.0414059
0.069864	0.591	3	SEED;DNA Metabolism;DNA replication;DNA-replication;DNA replication terminus site-binding protein;DNA replication terminus site-binding protein	0.273	0.0929961	10.0728	0.039219	0.0408172
0.0888623	0.591	2.72	SEED;Miscellaneous;ZZ_gjo_need_homes;Protein of unknown function YceH;Protein of unknown function YceH	0.3	0.0724833	10.0901	0.0389365	0.0406507
0.0682197	0.591	2.95	SEED;Cofactors, Vitamins, Prosthetic Groups, Pigments;Biotin;Biotin_biosynthesis;Biotin synthesis protein bioH;Biotin synthesis protein bioH	0.274	0.0923588	10.1342	0.0382269	0.0400357
0.0848772	0.591	1.71	SEED;Carbohydrates;Central carbohydrate metabolism;Pyruvate_metabolism_I:_anaplerotic_reactions,_PEP;Phosphoenolpyruvate synthase (EC 2.7.9.2);Phosphoenolpyruvate synthase (EC 2.7.9.2)	0.298	0.0740999	10.1378	0.0381696	0.0400357
0.0745261	0.591	3.02	SEED;Sulfur Metabolism;Organic sulfur assimilation;Taurine_Utilization;Taurine-binding periplasmic protein TauA;Taurine-binding periplasmic protein TauA	0.285	0.0831653	10.1671	0.0377056	0.0397405
0.0629573	0.591	4.31	SEED;Carbohydrates;CO2 fixation;Photorespiration_(oxidative_C2_cycle);Glycolate dehydrogenase (EC 1.1.99.14), FAD-binding subunit GlcE;Glycolate dehydrogenase (EC 1.1.99.14), FAD-binding subunit GlcE	0.268	0.0968848	10.1991	0.0372047	0.0393375
0.0700431	0.591	3.23	SEED;Cell Wall and Capsule;Capsular and extracellular polysacchrides;Capsular_Polysaccharide_(CPS)_of_Campylobacter;Capsular polysaccharide export system inner membrane protein KpsE;Capsular polysaccharide export system inner membrane protein KpsE	0.282	0.0855502	10.2346	0.0366561	0.0388812
0.0872741	0.591	2.35	SEED;Virulence;Adhesion;Curli_production;Curli production assembly/transport component CsgF;Curli production assembly/transport component CsgF	0.307	0.0677874	10.2602	0.0362661	0.0385908
0.0684776	0.591	2.76	SEED;DNA Metabolism;DNA replication;DNA-replication;Primosomal replication protein N prime prime;Primosomal replication protein N prime prime	0.283	0.0849495	10.2939	0.0357576	0.0381721
0.0756123	0.591	2.75	SEED;Stress Response;Heat_shock_dnaK_gene_cluster_extended;UPF0269 protein yggX;UPF0269 protein yggX	0.295	0.0762959	10.3105	0.0355092	0.0380292
0.0703745	0.591	2.97	SEED;Respiration;ATP synthases;F0F1-type_ATP_synthase;ATP synthase protein I;ATP synthase protein I	0.288	0.0808282	10.3387	0.0350928	0.037708
0.079466	0.591	3.07	SEED;Respiration;Formate_hydrogenase;Formate hydrogenlyase regulatory protein HycA;Formate hydrogenlyase regulatory protein HycA	0.301	0.0714199	10.3432	0.0350267	0.037708
0.0955582	0.597	1.55	SEED;Virulence;Type III, Type IV, Type VI, ESAT secretion systems;Type_4_secretion_and_conjugative_transfer;Conjugative transfer protein TrhV;Conjugative transfer protein TrhV	0.32	0.0595324	10.3385	0.0350957	0.037708
0.063815	0.591	3.03	SEED;Clustering-based subsystems;Type III secretion system, extended;CBSS-243265.1.peg.3592;putative type III secretion protein;putative type III secretion protein	0.281	0.0867608	10.3927	0.0343071	0.0376379
0.0791409	0.591	2	SEED;Clustering-based subsystems;Type III secretion system, extended;CBSS-243265.1.peg.3592;MxiH protein;MxiH protein	0.302	0.0708924	10.3662	0.0346903	0.0376379
0.0795417	0.591	2.21	SEED;Cell Wall and Capsule;Gram-Negative cell wall components;LOS_core_oligosaccharide_biosynthesis;Lipopolysaccharide heptosyltransferase I (EC 2.4.1.-);Lipopolysaccharide heptosyltransferase I (EC 2.4.1.-)	0.303	0.0703679	10.371	0.0346213	0.0376379
0.0806218	0.591	2.69	SEED;Nitrogen Metabolism;Nitrate_and_nitrite_ammonification;Cytochrome c-type protein NrfB precursor;Cytochrome c-type protein NrfB precursor	0.305	0.0693273	10.3738	0.0345804	0.0376379
0.0813836	0.591	2.31	SEED;Virulence;Type III, Type IV, Type VI, ESAT secretion systems;Type_4_secretion_and_conjugative_transfer;Integral inner membrane protein of type IV secretion complex (VirB6);Integral inner membrane protein of type IV secretion complex (VirB6)	0.306	0.0682979	10.3849	0.0344197	0.0376379
0.0564938	0.591	2.3	SEED;Carbohydrates;Monosaccharides;L-rhamnose_utilization;Predicted rhamnogalacturonide-specific TRAP-type transporter, small transmembrane component RhiB;Predicted rhamnogalacturonide-specific TRAP-type transporter, small transmembrane component RhiB	0.268	0.0968848	10.4157	0.033978	0.0375068
0.0635897	0.591	2.47	SEED;Metabolism of Aromatic Compounds;Metabolism of central aromatic intermediates;Central_meta-cleavage_pathway_of_aromatic_compound_degradation;3,4-dihydroxyphenylacetate 2,3-dioxygenase;3,4-dihydroxyphenylacetate 2,3-dioxygenase	0.282	0.086154	10.4138	0.0340047	0.0375068
0.0657508	0.591	0.3	SEED;DNA Metabolism;DNA repair;DNA_Repair_Base_Excision;Single-stranded-DNA-specific exonuclease RecJ, clostridial paralog;Single-stranded-DNA-specific exonuclease RecJ, clostridial paralog	-0.287	0.0819908	10.4461	0.0335481	0.0373666
0.0657508	0.591	0.3	SEED;DNA Metabolism;DNA repair;DNA_repair,_bacterial_RecFOR_pathway;Single-stranded-DNA-specific exonuclease RecJ, clostridial paralog;Single-stranded-DNA-specific exonuclease RecJ, clostridial paralog	-0.287	0.0819908	10.4461	0.0335481	0.0373666
0.075204	0.591	3.58	SEED;Carbohydrates;Monosaccharides;Hexose_Phosphate_Uptake_System;Transcriptional regulatory protein UhpA;Transcriptional regulatory protein UhpA	0.301	0.0719502	10.4387	0.0336524	0.0373666
0.0855954	0.591	3	SEED;Phosphorus Metabolism;Alkylphosphonate_utilization;PhnJ protein;PhnJ protein	0.316	0.0623558	10.466	0.0332679	0.037314
0.0940696	0.597	3.01	SEED;Amino Acids and Derivatives;Arginine; urea cycle, polyamines;Arginine_Biosynthesis_extended;N-acetylglutamate synthase (EC 2.3.1.1);N-acetylglutamate synthase (EC 2.3.1.1)	0.325	0.0563599	10.4794	0.0330814	0.0372306
0.0976818	0.599	2.12	SEED;Cell Wall and Capsule;Peptidoglycan_Biosynthesis;Murein-DD-endopeptidase (EC 3.4.99.-);Murein-DD-endopeptidase (EC 3.4.99.-)	0.329	0.0541724	10.4832	0.0330286	0.0372306
0.0549405	0.591	3.5	SEED;Carbohydrates;Central carbohydrate metabolism;Entner-Doudoroff_Pathway;Phosphogluconate dehydratase (EC 4.2.1.12);Phosphogluconate dehydratase (EC 4.2.1.12)	0.27	0.0955762	10.4987	0.0328153	0.0371832
0.0700594	0.591	3.16	SEED;Virulence;Type III, Type IV, Type VI, ESAT secretion systems;Type_4_secretion_and_conjugative_transfer;IncF plasmid conjugative transfer protein TraD;IncF plasmid conjugative transfer protein TraD	0.297	0.0746446	10.5069	0.0327026	0.0371824
0.0597114	0.591	3.31	SEED;Virulence;Resistance to antibiotics and toxic compounds;Copper_homeostasis;Blue copper oxidase CueO precursor;Blue copper oxidase CueO precursor	0.281	0.0867608	10.5257	0.0324453	0.0370166
0.048548	0.582	3.51	SEED;DNA Metabolism;DNA repair;DNA_Repair_Base_Excision;Endonuclease VIII;Endonuclease VIII	0.266	0.0988711	10.6783	0.0304278	0.0351916
0.0514822	0.591	2.56	SEED;Motility and Chemotaxis;Flagellar motility in Prokaryota;Flagellum;Flagellar assembly protein FliH;Flagellar assembly protein FliH	0.272	0.0936365	10.6697	0.0305379	0.0351916
0.0646141	0.591	2.71	SEED;Stress Response;Universal_stress_protein_family;Universal stress protein A;Universal stress protein A	0.296	0.0751921	10.6541	0.0307397	0.0351916
0.0776346	0.591	2.49	SEED;Respiration;Biogenesis_of_c-type_cytochromes;Cytochrome c-type biogenesis protein CcmG/DsbE, thiol:disulfide oxidoreductase;Cytochrome c-type biogenesis protein CcmG/DsbE, thiol:disulfide oxidoreductase	0.315	0.0623558	10.6613	0.0306464	0.0351916
0.0776346	0.591	2.49	SEED;Protein Metabolism;Protein folding;Periplasmic_disulfide_interchange;Cytochrome c-type biogenesis protein CcmG/DsbE, thiol:disulfide oxidoreductase;Cytochrome c-type biogenesis protein CcmG/DsbE, thiol:disulfide oxidoreductase	0.315	0.0623558	10.6613	0.0306464	0.0351916
0.083171	0.591	3.29	SEED;Amino Acids and Derivatives;Branched-chain amino acids;Leucine_Biosynthesis;Probable transcriptional activator for leuABCD operon;Probable transcriptional activator for leuABCD operon	0.323	0.0581569	10.6629	0.0306251	0.0351916
0.0493854	0.582	3.24	SEED;Respiration;Electron donating reactions;Succinate_dehydrogenase;Succinate dehydrogenase cytochrome b-556 subunit;Succinate dehydrogenase cytochrome b-556 subunit	0.271	0.09428	10.7392	0.0296571	0.0346696
0.0773562	0.591	2.24	SEED;RNA Metabolism;RNA processing and modification;tRNA_processing;tRNA pseudouridine 13 synthase (EC 4.2.1.-);tRNA pseudouridine 13 synthase (EC 4.2.1.-)	0.319	0.0599962	10.7456	0.0295767	0.0346696
0.071152	0.591	1.68	SEED;Carbohydrates;Fermentation;Fermentations:_Mixed_acid;Formate efflux transporter (TC 2.A.44 family);Formate efflux transporter (TC 2.A.44 family)	0.314	0.0628358	10.8203	0.0286592	0.0339741
0.0793517	0.591	1.77	SEED;DNA Metabolism;YcfH;Putative deoxyribonuclease YjjV;Putative deoxyribonuclease YjjV	0.324	0.0568052	10.804	0.0288576	0.0339741
0.0793517	0.591	1.77	SEED;Carbohydrates;Monosaccharides;Deoxyribose_and_Deoxynucleoside_Catabolism;Putative deoxyribonuclease YjjV;Putative deoxyribonuclease YjjV	0.324	0.0568052	10.804	0.0288576	0.0339741
0.080726	0.591	2.87	SEED;Motility and Chemotaxis;Flagellar motility in Prokaryota;Flagellum;Flagellar transcriptional activator FlhC;Flagellar transcriptional activator FlhC	0.327	0.0554771	10.817	0.0287	0.0339741
0.0910376	0.592	1.81	SEED;Protein Metabolism;Protein degradation;Proteolysis_in_bacteria,_ATP-dependent;ClpXP protease specificity-enhancing factor;ClpXP protease specificity-enhancing factor	0.339	0.0487837	10.8337	0.0284982	0.0339741
0.0903937	0.591	2.52	SEED;Cofactors, Vitamins, Prosthetic Groups, Pigments;Riboflavin, FMN, FAD;Flavodoxin;Hypothetical flavoprotein YqcA (clustered with tRNA pseudouridine synthase C);Hypothetical flavoprotein YqcA (clustered with tRNA pseudouridine synthase C)	0.34	0.0483867	10.8642	0.0281331	0.0337191
0.0453334	0.582	3.27	SEED;Carbohydrates;Monosaccharides;D-galactonate_catabolism;2-dehydro-3-deoxygalactonokinase (EC 2.7.1.58);2-dehydro-3-deoxygalactonokinase (EC 2.7.1.58)	0.27	0.0955762	10.8831	0.0279099	0.0336852
0.0736395	0.591	3.51	SEED;Sulfur Metabolism;Organic sulfur assimilation;Alkanesulfonate_assimilation;FMN reductase (EC 1.5.1.29);FMN reductase (EC 1.5.1.29)	0.321	0.0590712	10.8752	0.0280033	0.0336852
0.0477272	0.582	3.08	SEED;Motility and Chemotaxis;Flagellar motility in Prokaryota;Flagellum;Flagellar biosynthesis protein FlgN;Flagellar biosynthesis protein FlgN	0.277	0.0898403	10.904	0.0276649	0.033521
0.083408	0.591	1.31	SEED;Protein Metabolism;Protein biosynthesis;Translation_elongation_factors_eukaryotic_and_archaeal;Eukaryotic peptide chain release factor GTP-binding subunit;Eukaryotic peptide chain release factor GTP-binding subunit	0.335	0.0512179	10.9114	0.0275785	0.033521
0.0522836	0.591	2.88	SEED;Virulence;Type III, Type IV, Type VI, ESAT secretion systems;Type_4_conjugative_transfer_system,_IncI1_type;IncI1 plasmid conjugative transfer protein TraV;IncI1 plasmid conjugative transfer protein TraV	0.288	0.0808282	10.933	0.0273274	0.0333555
0.0646843	0.591	3.5	SEED;Virulence;Iron Scavenging Mechanisms;Siderophore_Aerobactin;Ferric hydroxamate outer membrane receptor FhuA;Ferric hydroxamate outer membrane receptor FhuA	0.312	0.0647833	10.9499	0.027133	0.0332404
0.0646843	0.591	3.5	SEED;Virulence;Iron Scavenging Mechanisms;Iron_acquisition_in_Vibrio;Ferric hydroxamate outer membrane receptor FhuA;Ferric hydroxamate outer membrane receptor FhuA	0.312	0.0647833	10.9499	0.027133	0.0332404
0.0429911	0.578	3.52	SEED;Regulation and Cell signaling;Orphan_regulatory_proteins;Copper sensory histidine kinase CpxA;Copper sensory histidine kinase CpxA	0.269	0.0962289	10.9756	0.0268399	0.0331452
0.0869718	0.591	2.04	SEED;DNA Metabolism;DNA repair;DNA_repair,_bacterial;Methyl-directed repair DNA adenine methylase (EC 2.1.1.72);Methyl-directed repair DNA adenine methylase (EC 2.1.1.72)	0.342	0.0476	10.9742	0.0268556	0.0331452
0.0713147	0.591	2.87	SEED;Amino Acids and Derivatives;Arginine; urea cycle, polyamines;Arginine_and_Ornithine_Degradation;Succinylglutamate desuccinylase (EC 3.5.1.96);Succinylglutamate desuccinylase (EC 3.5.1.96)	0.324	0.0568052	11.0176	0.0263674	0.0327864
0.0471225	0.582	3.68	SEED;Regulation and Cell signaling;DNA-binding_regulatory_proteins,_strays;LysR family transcriptional regulator YneJ;LysR family transcriptional regulator YneJ	0.285	0.083757	11.0697	0.025792	0.032252
0.0529926	0.591	3.4	SEED;Regulation and Cell signaling;Programmed Cell Death and Toxin-antitoxin Systems;MazEF_toxin-antitoxing_(programmed_cell_death)_system;Programmed cell death toxin ChpB;Programmed cell death toxin ChpB	0.297	0.0746446	11.0652	0.0258405	0.032252
0.0558925	0.591	1.99	SEED;Membrane Transport;Transport_of_Manganese;Manganese ABC transporter, periplasmic-binding protein SitA;Manganese ABC transporter, periplasmic-binding protein SitA	0.304	0.0698461	11.0916	0.0255539	0.032136
0.0675156	0.591	3.22	SEED;Sulfur Metabolism;Organic sulfur assimilation;Alkanesulfonate_assimilation;Alpha-ketoglutarate-dependent taurine dioxygenase (EC 1.14.11.17);Alpha-ketoglutarate-dependent taurine dioxygenase (EC 1.14.11.17)	0.323	0.0577037	11.0957	0.0255097	0.032136
0.0809078	0.591	2.01	SEED;Amino Acids and Derivatives;Arginine; urea cycle, polyamines;Arginine_and_Ornithine_Degradation;Arginine ABC transporter, permease protein ArtM;Arginine ABC transporter, permease protein ArtM	0.342	0.0476	11.1187	0.0252615	0.0320107
0.0433815	0.578	2.27	SEED;Cofactors, Vitamins, Prosthetic Groups, Pigments;Folate and pterines;Molybdenum_cofactor_biosynthesis;Molybdenum cofactor biosynthesis protein MoaE;Molybdenum cofactor biosynthesis protein MoaE	0.281	0.0867608	11.1646	0.0247746	0.0318677
0.0530044	0.591	1.33	SEED;Protein Metabolism;Secretion;Twin-arginine_translocation_system;Twin-arginine translocation protein TatC;Twin-arginine translocation protein TatC	0.301	0.0719502	11.1383	0.0250526	0.0318677
0.0530044	0.591	1.33	SEED;Clustering-based subsystems;proteosome related;Cluster-based_Subsystem_Grouping_Hypotheticals_-_perhaps_Proteosome_Related;Twin-arginine translocation protein TatC;Twin-arginine translocation protein TatC	0.301	0.0719502	11.1383	0.0250526	0.0318677
0.0553868	0.591	3.12	SEED;Regulation and Cell signaling;cAMP_signaling_in_bacteria;Hydrolase, alpha/beta fold family functionally coupled to Phosphoribulokinase;Hydrolase, alpha/beta fold family functionally coupled to Phosphoribulokinase	0.306	0.0682979	11.1546	0.0248806	0.0318677
0.0602196	0.591	2.71	SEED;Carbohydrates;Aminosugars;Chitin_and_N-acetylglucosamine_utilization;PTS system, chitobiose-specific IIC component (EC 2.7.1.69);PTS system, chitobiose-specific IIC component (EC 2.7.1.69)	0.314	0.0628358	11.154	0.024887	0.0318677
0.0416448	0.578	3.44	SEED;Virulence;Ton_and_Tol_transport_systems;Protein-L-isoaspartate O-methyltransferase (EC 2.1.1.77);Protein-L-isoaspartate O-methyltransferase (EC 2.1.1.77)	0.28	0.0879835	11.2184	0.0242164	0.031629
0.0553318	0.591	3.65	SEED;Carbohydrates;Monosaccharides;D-ribose_utilization;Ribose/xylose/arabinose/galactoside ABC-type transport systems, permease component 1;Ribose/xylose/arabinose/galactoside ABC-type transport systems, permease component 1	0.309	0.0667749	11.2017	0.0243886	0.031629
0.0669707	0.591	2.84	SEED;Carbohydrates;Monosaccharides;L-rhamnose_utilization;L-rhamnose operon transcriptional activator RhaR;L-rhamnose operon transcriptional activator RhaR	0.328	0.0550397	11.2064	0.0243397	0.031629
0.0946396	0.597	2.58	SEED;DNA Metabolism;DNA_structural_proteins,_bacterial;Chromosome partition protein MukF;Chromosome partition protein MukF	0.361	0.0385665	11.2261	0.0241371	0.031629
0.0946396	0.597	2.58	SEED;Cell Division and Cell Cycle;Cell cycle in Prokaryota;MukBEF_Chromosome_Condensation;Chromosome partition protein MukF;Chromosome partition protein MukF	0.361	0.0385665	11.2261	0.0241371	0.031629
0.0378755	0.576	2.07	SEED;Carbohydrates;Monosaccharides;D-galactarate,_D-glucarate_and_D-glycerate_catabolism;Glucarate dehydratase (EC 4.2.1.40);Glucarate dehydratase (EC 4.2.1.40)	0.271	0.0949265	11.2562	0.0238306	0.031521
0.0408305	0.578	4.05	SEED;Stress Response;Bacterial_hemoglobins;Flavohemoprotein;Flavohemoprotein	0.281	0.086154	11.2999	0.0233926	0.0310654
0.0408305	0.578	4.05	SEED;Nitrogen Metabolism;Nitrosative_stress;Flavohemoprotein;Flavohemoprotein	0.281	0.086154	11.2999	0.0233926	0.0310654
0.0354789	0.57	2.14	SEED;Carbohydrates;Monosaccharides;D-Sorbitol(D-Glucitol)_and_L-Sorbose_Utilization;Glucitol operon repressor;Glucitol operon repressor	0.267	0.0982059	11.319	0.0232033	0.0310625
0.0484901	0.582	3.12	SEED;RNA Metabolism;RNA processing and modification;RNA_3'-terminal_phosphate_cyclase;RNA 3'-terminal phosphate cyclase (EC 6.5.1.4);RNA 3'-terminal phosphate cyclase (EC 6.5.1.4)	0.302	0.0714199	11.3311	0.0230839	0.0310625
0.0759758	0.591	3.22	SEED;Cell Wall and Capsule;Gram-Negative cell wall components;Lipid_A_modifications;Lipid A acylation protein PagP, palmitoyltransferase;Lipid A acylation protein PagP, palmitoyltransferase	0.345	0.0456758	11.3271	0.0231241	0.0310625
0.0608605	0.591	2.29	SEED;Cell Wall and Capsule;Capsular and extracellular polysacchrides;Sialic_Acid_Metabolism;Sialic acid biosynthesis protein NeuD, O-acetyltransferase;Sialic acid biosynthesis protein NeuD, O-acetyltransferase	0.326	0.0559172	11.3661	0.0227434	0.0308197
0.0608605	0.591	2.29	SEED;Cell Wall and Capsule;Capsular and extracellular polysacchrides;CMP-N-acetylneuraminate_Biosynthesis;Sialic acid biosynthesis protein NeuD, O-acetyltransferase;Sialic acid biosynthesis protein NeuD, O-acetyltransferase	0.326	0.0559172	11.3661	0.0227434	0.0308197
0.0385506	0.576	3.45	SEED;Virulence;Type III, Type IV, Type VI, ESAT secretion systems;Type_III_secretion_system_orphans;BarA-associated response regulator UvrY (= GacA = SirA);BarA-associated response regulator UvrY (= GacA = SirA)	0.28	0.0873706	11.3868	0.0225446	0.0308016
0.0385506	0.576	3.45	SEED;Virulence;Quorum sensing and biofilm formation;Quorum_sensing_regulation_in_Pseudomonas;BarA-associated response regulator UvrY (= GacA = SirA);BarA-associated response regulator UvrY (= GacA = SirA)	0.28	0.0873706	11.3868	0.0225446	0.0308016
0.0385506	0.576	3.45	SEED;Virulence;Pseudomonas_quinolone_signal_PQS;BarA-associated response regulator UvrY (= GacA = SirA);BarA-associated response regulator UvrY (= GacA = SirA)	0.28	0.0873706	11.3868	0.0225446	0.0308016
0.0385506	0.576	3.45	SEED;Regulation and Cell signaling;Orphan_regulatory_proteins;BarA-associated response regulator UvrY (= GacA = SirA);BarA-associated response regulator UvrY (= GacA = SirA)	0.28	0.0873706	11.3868	0.0225446	0.0308016
0.0712472	0.591	2.48	SEED;Amino Acids and Derivatives;Lysine, threonine, methionine, and cysteine.1;Cysteine_Biosynthesis;Sulfite reductase [NADPH] hemoprotein beta-component (EC 1.8.1.2);Sulfite reductase [NADPH] hemoprotein beta-component (EC 1.8.1.2)	0.344	0.0464382	11.4225	0.0222047	0.0308016
0.0429923	0.578	3.51	SEED;Motility and Chemotaxis;Bacterial_Chemotaxis;Chemotaxis response - phosphatase CheZ;Chemotaxis response - phosphatase CheZ	0.296	0.0751921	11.4689	0.0217703	0.0303687
0.0339773	0.57	1.34	SEED;RNA Metabolism;RNA processing and modification;Queuosine-Archaeosine_Biosynthesis;Queuosine Biosynthesis QueE Radical SAM;Queuosine Biosynthesis QueE Radical SAM	0.274	0.0917246	11.5421	0.0211023	0.029561
0.0484845	0.582	3.94	SEED;Virulence;Siderophore_Enterobactin;Isochorismate synthase (EC 5.4.4.2) [enterobactin] siderophore;Isochorismate synthase (EC 5.4.4.2) [enterobactin] siderophore	0.313	0.0638041	11.5569	0.0209692	0.029499
0.063358	0.591	2.67	SEED;Membrane Transport;ABC transporters;ABC_transporter_peptide_(TC_3.A.1.5.5);Peptide transport periplasmic protein sapA (TC 3.A.1.5.5);Peptide transport periplasmic protein sapA (TC 3.A.1.5.5)	0.342	0.0472103	11.6242	0.020376	0.0287865
0.031508	0.57	3.28	SEED;Nitrogen Metabolism;Nitrosative_stress;NADH oxidoreductase hcr (EC 1.-.-.-);NADH oxidoreductase hcr (EC 1.-.-.-)	0.272	0.0936365	11.6517	0.0201383	0.0285723
0.0474338	0.582	3.28	SEED;Virulence;Iron Scavenging Mechanisms;Iron_acquisition_in_Vibrio;Bacterioferritin-associated ferredoxin;Bacterioferritin-associated ferredoxin	0.317	0.0614039	11.6774	0.0199185	0.0285296
0.0665992	0.591	3.05	SEED;Carbohydrates;Monosaccharides;Fructose_utilization;Fructose repressor FruR, LacI family;Fructose repressor FruR, LacI family	0.349	0.0438114	11.6738	0.0199488	0.0285296
0.0991924	0.602	2	SEED;Virulence;Type III, Type IV, Type VI, ESAT secretion systems;Type_4_conjugative_transfer_system,_IncI1_type;IncI1 plasmid conjugative transfer protein TraS;IncI1 plasmid conjugative transfer protein TraS	0.384	0.0295426	11.6652	0.0200223	0.0285296
0.0376357	0.576	3.05	SEED;Miscellaneous;ZZ_gjo_need_homes;Phosphocarrier protein kinase/phosphorylase, nitrogen regulation associated;Phosphocarrier protein kinase/phosphorylase, nitrogen regulation associated	0.294	0.0762959	11.7059	0.0196779	0.0284046
0.043048	0.578	1.93	SEED;Protein Metabolism;Protein degradation;Proteolysis_in_bacteria,_ATP-dependent;Outer membrane stress sensor protease DegS;Outer membrane stress sensor protease DegS	0.309	0.0662728	11.7188	0.0195693	0.0283712
0.0339496	0.57	2.99	SEED;Virulence;Type III, Type IV, Type VI, ESAT secretion systems;Type_4_conjugative_transfer_system,_IncI1_type;IncI1 plasmid conjugative transfer protein TraW;IncI1 plasmid conjugative transfer protein TraW	0.286	0.0825765	11.7538	0.019279	0.0281804
0.047302	0.582	3.22	SEED;Virulence;Siderophore_Enterobactin;Outer membrane receptor for ferric enterobactin and colicins B, D;Outer membrane receptor for ferric enterobactin and colicins B, D	0.32	0.0595324	11.7449	0.0193528	0.0281804
0.0676612	0.591	3.1	SEED;Regulation and Cell signaling;DNA-binding_regulatory_proteins,_strays;LysR family transcriptional regulator YnfL;LysR family transcriptional regulator YnfL	0.355	0.0412998	11.7603	0.0192258	0.0281804
0.0449329	0.582	2.31	SEED;RNA Metabolism;RNA processing and modification;ATP-dependent_RNA_helicases,_bacterial;ATP-dependent RNA helicase RhlB;ATP-dependent RNA helicase RhlB	0.318	0.0609319	11.8012	0.0188928	0.0278773
0.0316461	0.57	5.08	SEED;Motility and Chemotaxis;Flagellar motility in Prokaryota;Flagellum;Flagellar biosynthesis protein FliC;Flagellar biosynthesis protein FliC	0.282	0.0855502	11.8236	0.0187125	0.0278001
0.0463177	0.582	3.43	SEED;Virulence;Type III, Type IV, Type VI, ESAT secretion systems;Type_4_conjugative_transfer_system,_IncI1_type;IncI1 plasmid conjugative transfer protein TraU;IncI1 plasmid conjugative transfer protein TraU	0.322	0.0586127	11.8181	0.0187567	0.0278001
0.0297856	0.57	2.99	SEED;Carbohydrates;Di- and oligosaccharides;Maltose_and_Maltodextrin_Utilization;Maltose operon periplasmic protein MalM;Maltose operon periplasmic protein MalM	0.28	0.0873706	11.9027	0.01809	0.0274134
0.0309638	0.57	3.6	SEED;Virulence;Resistance to antibiotics and toxic compounds;Copper_homeostasis;Copper resistance protein D;Copper resistance protein D	0.284	0.083757	11.9095	0.0180367	0.0274134
0.0332655	0.57	4.83	SEED;Virulence;Invasion and intracellular resistance;Listeria_surface_proteins:_Internalin-like_proteins;internalin, putative;internalin, putative	0.293	0.0774114	11.9237	0.0179277	0.0274134
0.0414217	0.578	3.04	SEED;RNA Metabolism;RNA processing and modification;RNA_processing_and_degradation,_bacterial;Ribonuclease E inhibitor RraA;Ribonuclease E inhibitor RraA	0.313	0.0638041	11.8718	0.0183307	0.0274134
0.051702	0.591	1.98	SEED;Nucleosides and Nucleotides;Purines;Purine_nucleotide_synthesis_regulator;Purine nucleotide synthesis repressor;Purine nucleotide synthesis repressor	0.336	0.050806	11.884	0.018235	0.0274134
0.0639025	0.591	1.98	SEED;Membrane Transport;Potassium_homeostasis;Potassium efflux system KefA;Potassium efflux system KefA	0.355	0.0409503	11.8916	0.0181759	0.0274134
0.0882171	0.591	1.75	SEED;DNA Metabolism;DNA repair;DNA_repair,_bacterial;DNA mismatch repair endonuclease MutH;DNA mismatch repair endonuclease MutH	0.383	0.0298138	11.8815	0.0182548	0.0274134
0.0538355	0.591	1.75	SEED;Nitrogen Metabolism;Nitrate_and_nitrite_ammonification;Nitrite transporter from formate/nitrite family;Nitrite transporter from formate/nitrite family	0.342	0.0472103	11.9499	0.0177275	0.0273746
0.032257	0.57	2.6	SEED;Respiration;Electron donating reactions;Succinate_dehydrogenase;Fumarate reductase subunit D;Fumarate reductase subunit D	0.292	0.0779734	11.9708	0.0175696	0.0272575
0.0300398	0.57	3.45	SEED;Cell Division and Cell Cycle;Cell cycle in Prokaryota;Bacterial_Cytoskeleton;Cell division protein FtsB;Cell division protein FtsB	0.287	0.0819908	12.0128	0.0172566	0.0272044
0.0317779	0.57	4.15	SEED;Carbohydrates;Monosaccharides;D-gluconate_and_ketogluconates_metabolism;Gluconate utilization system Gnt-I transcriptional repressor;Gluconate utilization system Gnt-I transcriptional repressor	0.292	0.0785385	11.9863	0.0174534	0.0272044
0.0404796	0.578	3.22	SEED;Regulation and Cell signaling;Orphan_regulatory_proteins;Glycine cleavage system transcriptional activator;Glycine cleavage system transcriptional activator	0.319	0.0599962	12.0409	0.01705	0.0272044
0.0609447	0.591	2.75	SEED;DNA Metabolism;DNA repair;DNA_repair,_bacterial;Alkylated DNA repair protein AlkB;Alkylated DNA repair protein AlkB	0.355	0.0409503	11.9864	0.0174529	0.0272044
0.0615875	0.591	2.11	SEED;Carbohydrates;Central carbohydrate metabolism;TCA_Cycle;2-oxoglutarate dehydrogenase E1 component (EC 1.2.4.2);2-oxoglutarate dehydrogenase E1 component (EC 1.2.4.2)	0.357	0.0402579	11.9995	0.0173551	0.0272044
0.0789507	0.591	3.4	SEED;Nucleosides and Nucleotides;Pyrimidines;Pyrimidine_utilization;Predicted reductase RutE in novel pyrimidine catabolism pathway;Predicted reductase RutE in novel pyrimidine catabolism pathway	0.381	0.0306393	12.0488	0.016992	0.0272044
0.0834687	0.591	2.45	SEED;Miscellaneous;ZZ_gjo_need_homes;Putative permease PerM (= YfgO);Putative permease PerM (= YfgO)	0.385	0.0292733	12.0287	0.0171389	0.0272044
0.0270661	0.57	3.68	SEED;Carbohydrates;Di- and oligosaccharides;Maltose_and_Maltodextrin_Utilization;Maltose regulon regulatory protein MalI (repressor for malXY);Maltose regulon regulatory protein MalI (repressor for malXY)	0.278	0.0885993	12.0662	0.0168657	0.0272021
0.0611715	0.591	3.71	SEED;Regulation and Cell signaling;DNA-binding_regulatory_proteins,_strays;LysR family transcriptional regulator YfeR;LysR family transcriptional regulator YfeR	0.36	0.0392364	12.0644	0.0168784	0.0272021
0.025307	0.57	2.3	SEED;Stress Response;Oxidative stress;Glutathionylspermidine_and_Trypanothione;Similarity with glutathionylspermidine synthase (EC 6.3.1.8), group 1;Similarity with glutathionylspermidine synthase (EC 6.3.1.8), group 1	0.276	0.0910934	12.1451	0.0163043	0.0269579
0.0348483	0.57	3.91	SEED;Regulation and Cell signaling;Orphan_regulatory_proteins;Positive transcription regulator EvgA;Positive transcription regulator EvgA	0.308	0.0672798	12.1113	0.0165426	0.0269579
0.0397522	0.578	3.15	SEED;RNA Metabolism;Transcription;Transcription_factors_bacterial;Transcriptional activator RfaH;Transcriptional activator RfaH	0.32	0.0590712	12.1082	0.0165645	0.0269579
0.0415655	0.578	2.99	SEED;Miscellaneous;ZZ_gjo_need_homes;Putative heat shock protein YegD;Putative heat shock protein YegD	0.326	0.0563599	12.113	0.0165307	0.0269579
0.0557547	0.591	3.39	SEED;Clustering-based subsystems;Conserved_gene_cluster_associated_with_Met-tRNA_formyltransferase;Protein of unknown function Smg;Protein of unknown function Smg	0.354	0.0416516	12.1304	0.0164074	0.0269579
0.0761099	0.591	1.72	SEED;Carbohydrates;CO2 fixation;Calvin-Benson_cycle;Fructose-1,6-bisphosphatase, type I (EC 3.1.3.11);Fructose-1,6-bisphosphatase, type I (EC 3.1.3.11)	0.383	0.0298138	12.1767	0.0160844	0.0269579
0.0837391	0.591	2.18	SEED;Protein Metabolism;Protein degradation;Proteolysis_in_bacteria,_ATP-dependent;Outer membrane stress sensor protease DegQ, serine protease;Outer membrane stress sensor protease DegQ, serine protease	0.388	0.0279556	12.1144	0.0165207	0.0269579
0.0886328	0.591	2.86	SEED;Cofactors, Vitamins, Prosthetic Groups, Pigments;NAD and NADP;NAD_and_NADP_cofactor_biosynthesis_global;Nicotinamidase family protein YcaC;Nicotinamidase family protein YcaC	0.395	0.0257021	12.1689	0.0161387	0.0269579
0.041971	0.578	3.65	SEED;Cofactors, Vitamins, Prosthetic Groups, Pigments;Quinone cofactors;Ubiquinone_Biosynthesis;Protein YigP (COG3165) clustered with ubiquinone biosynthetic genes;Protein YigP (COG3165) clustered with ubiquinone biosynthetic genes	0.332	0.0528909	12.2206	0.0157841	0.0267363
0.041971	0.578	3.65	SEED;Cofactors, Vitamins, Prosthetic Groups, Pigments;Quinone cofactors;Menaquinone_Biosynthesis_via_Futalosine;Protein YigP (COG3165) clustered with ubiquinone biosynthetic genes;Protein YigP (COG3165) clustered with ubiquinone biosynthetic genes	0.332	0.0528909	12.2206	0.0157841	0.0267363
0.0241895	0.57	4.85	SEED;Carbohydrates;Di- and oligosaccharides;Trehalose_Biosynthesis;Trehalose-6-phosphate phosphatase (EC 3.1.3.12);Trehalose-6-phosphate phosphatase (EC 3.1.3.12)	0.279	0.0885993	12.2909	0.015314	0.0267183
0.0311483	0.57	2.78	SEED;Cell Wall and Capsule;Gram-Negative cell wall components;LOS_core_oligosaccharide_biosynthesis;ADP-heptose--lipooligosaccharide heptosyltransferase II (EC 2.4.1.-);ADP-heptose--lipooligosaccharide heptosyltransferase II (EC 2.4.1.-)	0.303	0.0703679	12.246	0.0156125	0.0267183
0.0310037	0.57	3.34	SEED;Clustering-based subsystems;Bacterial_Cell_Division;Cell division protein BolA;Cell division protein BolA	0.303	0.0703679	12.2553	0.0155502	0.0267183
0.032574	0.57	2.69	SEED;Cell Wall and Capsule;Gram-Negative cell wall components;KDO2-Lipid_A_biosynthesis;LPS-assembly lipoprotein RlpB precursor (Rare lipoprotein B);LPS-assembly lipoprotein RlpB precursor (Rare lipoprotein B)	0.31	0.0652771	12.3067	0.0152104	0.0267183
0.0547024	0.591	1.79	SEED;Amino Acids and Derivatives;Proline and 4-hydroxyproline;Proline,_4-hydroxyproline_uptake_and_utilization;Proline dehydrogenase (EC 1.5.99.8) (Proline oxidase);Proline dehydrogenase (EC 1.5.99.8) (Proline oxidase)	0.357	0.0399152	12.2537	0.0155611	0.0267183
0.0818966	0.591	2.63	SEED;Regulation and Cell signaling;CytR_regulation;Cyclic AMP receptor protein;Cyclic AMP receptor protein	0.392	0.0266852	12.2519	0.0155732	0.0267183
0.0818966	0.591	2.63	SEED;Regulation and Cell signaling;cAMP_signaling_in_bacteria;Cyclic AMP receptor protein;Cyclic AMP receptor protein	0.392	0.0266852	12.2519	0.0155732	0.0267183
0.0337801	0.57	2.69	SEED;Amino Acids and Derivatives;Proline and 4-hydroxyproline;Proline,_4-hydroxyproline_uptake_and_utilization;ProQ: influences osmotic activation of compatible solute ProP;ProQ: influences osmotic activation of compatible solute ProP	0.319	0.0604628	12.3872	0.0146925	0.0263892
0.0343493	0.57	3.75	SEED;Protein Metabolism;Protein biosynthesis;Ribosome_activity_modulation;Ribosome modulation factor;Ribosome modulation factor	0.32	0.0595324	12.3848	0.0147077	0.0263892
0.094787	0.597	1.78	SEED;DNA Metabolism;DNA replication;DNA_topoisomerases,_Type_I,_ATP-independent;Similar to C-terminal Zn-finger domain of DNA topoisomerase I;Similar to C-terminal Zn-finger domain of DNA topoisomerase I	0.408	0.0218398	12.3603	0.0148638	0.0263892
0.094787	0.597	1.78	SEED;Clustering-based subsystems;Conserved_gene_cluster_associated_with_Met-tRNA_formyltransferase;Similar to C-terminal Zn-finger domain of DNA topoisomerase I;Similar to C-terminal Zn-finger domain of DNA topoisomerase I	0.408	0.0218398	12.3603	0.0148638	0.0263892
0.0209017	0.57	1.78	SEED;Phosphorus Metabolism;Phosphonate_metabolism;Phosphonoacetate hydrolase (EC 3.11.1.2);Phosphonoacetate hydrolase (EC 3.11.1.2)	0.271	0.09428	12.4588	0.0142464	0.0258459
0.0301118	0.57	4.04	SEED;Virulence;Siderophore_Enterobactin;2,3-dihydroxybenzoate-AMP ligase (EC 2.7.7.58) [enterobactin] siderophore;2,3-dihydroxybenzoate-AMP ligase (EC 2.7.7.58) [enterobactin] siderophore	0.31	0.0652771	12.4639	0.0142152	0.0258459
0.0196851	0.57	3.61	SEED;Virulence;Type III, Type IV, Type VI, ESAT secretion systems;Type_4_conjugative_transfer_system,_IncI1_type;Type-IV sectretion leader peptidase/N-methyltransferase;Type-IV sectretion leader peptidase/N-methyltransferase	0.272	0.0936365	12.5925	0.0134487	0.025688
0.0168717	0.57	3.25	SEED;Respiration;Biogenesis_of_c-type_cytochromes;Periplasmic thiol:disulfide interchange protein DsbA;Periplasmic thiol:disulfide interchange protein DsbA	0.273	0.0929961	12.9146	0.0117005	0.025688
0.0168717	0.57	3.25	SEED;Protein Metabolism;Protein folding;Periplasmic_disulfide_interchange;Periplasmic thiol:disulfide interchange protein DsbA;Periplasmic thiol:disulfide interchange protein DsbA	0.273	0.0929961	12.9146	0.0117005	0.025688
0.0207609	0.57	2.42	SEED;Clustering-based subsystems;Type III secretion system, extended;CBSS-243265.1.peg.3592;Type III secretion outermembrane contact sensing protein( yopN,Yop4b,LcrE);Type III secretion outermembrane contact sensing protein( yopN,Yop4b,LcrE)	0.275	0.0917246	12.5273	0.0138321	0.025688
0.0227413	0.57	3.77	SEED;Cofactors, Vitamins, Prosthetic Groups, Pigments;Folate and pterines;Folate_Biosynthesis;FolM Alternative dihydrofolate reductase 1;FolM Alternative dihydrofolate reductase 1	0.283	0.0849495	12.4985	0.0140046	0.025688
0.0174763	0.57	4.11	SEED;Carbohydrates;Aminosugars;Chitin_and_N-acetylglucosamine_utilization;Chitobiose-specific regulator ChbR, AraC family;Chitobiose-specific regulator ChbR, AraC family	0.284	0.0843518	13.0393	0.0110852	0.025688
0.0208754	0.57	4.2	SEED;Virulence;Siderophore_Enterobactin;Proofreading thioesterase in enterobactin biosynthesis EntH;Proofreading thioesterase in enterobactin biosynthesis EntH	0.289	0.0808282	12.7692	0.0124602	0.025688
0.0181815	0.57	4.31	SEED;Motility and Chemotaxis;Bacterial_Chemotaxis;Methyl-accepting chemotaxis protein I (serine chemoreceptor protein);Methyl-accepting chemotaxis protein I (serine chemoreceptor protein)	0.291	0.0791065	13.0886	0.0108508	0.025688
0.0237418	0.57	2.33	SEED;Nitrogen Metabolism;Ammonia_assimilation;[Protein-PII] uridylyltransferase (EC 2.7.7.59);[Protein-PII] uridylyltransferase (EC 2.7.7.59)	0.292	0.0785385	12.5694	0.0135834	0.025688
0.02096	0.57	3.87	SEED;Clustering-based subsystems;CBSS-562.2.peg.5158_SK3_including;Protein YaiA;Protein YaiA	0.294	0.0768521	12.862	0.01197	0.025688
0.0261984	0.57	3.64	SEED;Regulation and Cell signaling;Stringent_Response,_(p)ppGpp_metabolism;Guanosine-5'-triphosphate,3'-diphosphate pyrophosphatase (EC 3.6.1.40);Guanosine-5'-triphosphate,3'-diphosphate pyrophosphatase (EC 3.6.1.40)	0.299	0.0730193	12.5182	0.0138866	0.025688
0.0214225	0.57	3.07	SEED;Membrane Transport;ABC transporters;ABC_transporter_peptide_(TC_3.A.1.5.5);Peptide transport system permease protein sapC (TC 3.A.1.5.5);Peptide transport system permease protein sapC (TC 3.A.1.5.5)	0.304	0.0693273	13.0245	0.0111569	0.025688
0.024347	0.57	3.71	SEED;Cell Wall and Capsule;Peptidoglycan_Biosynthesis;Membrane-bound lytic murein transglycosylase B precursor (EC 3.2.1.-);Membrane-bound lytic murein transglycosylase B precursor (EC 3.2.1.-)	0.31	0.0657736	12.8738	0.0119093	0.025688
0.0272687	0.57	4.55	SEED;Carbohydrates;Monosaccharides;Hexose_Phosphate_Uptake_System;Sensor histidine protein kinase UhpB, glucose-6-phosphate specific (EC 2.7.13.3);Sensor histidine protein kinase UhpB, glucose-6-phosphate specific (EC 2.7.13.3)	0.313	0.0638041	12.7079	0.0127948	0.025688
0.0286201	0.57	4.09	SEED;Nitrogen Metabolism;Allantoin_Utilization;Allantoin permease;Allantoin permease	0.318	0.0609319	12.7033	0.0128204	0.025688
0.0320866	0.57	2.9	SEED;Regulation and Cell signaling;cAMP_signaling_in_bacteria;3',5'-cyclic-nucleotide phosphodiesterase (EC 3.1.4.17);3',5'-cyclic-nucleotide phosphodiesterase (EC 3.1.4.17)	0.321	0.0586127	12.5522	0.0136841	0.025688
0.0321552	0.57	3.21	SEED;Respiration;Electron accepting reactions;Anaerobic_respiratory_reductases;Flavodoxin reductases (ferredoxin-NADPH reductases) family 1;Flavodoxin reductases (ferredoxin-NADPH reductases) family 1	0.328	0.0546048	12.6896	0.0128962	0.025688
0.0346758	0.57	2.19	SEED;Stress Response;Oxidative stress;Oxidative_stress;Paraquat-inducible protein B;Paraquat-inducible protein B	0.33	0.0537427	12.5705	0.0135766	0.025688
0.0294235	0.57	3.43	SEED;Nitrogen Metabolism;Ammonia_assimilation;Nitrogen regulation protein NR(II) (EC 2.7.3.-);Nitrogen regulation protein NR(II) (EC 2.7.3.-)	0.331	0.0533156	12.915	0.0116988	0.025688
0.0344104	0.57	3.45	SEED;Carbohydrates;Monosaccharides;D-Sorbitol(D-Glucitol)_and_L-Sorbose_Utilization;Glucitol operon GutQ protein;Glucitol operon GutQ protein	0.336	0.050806	12.6983	0.0128482	0.025688
0.0299427	0.57	3.75	SEED;Virulence;Type III, Type IV, Type VI, ESAT secretion systems;Type_4_secretion_and_conjugative_transfer;IncF plasmid conjugative transfer pilus assembly protein TraE;IncF plasmid conjugative transfer pilus assembly protein TraE	0.338	0.0495852	13.0251	0.011154	0.025688
0.0312312	0.57	3.7	SEED;Cell Wall and Capsule;Peptidoglycan_Biosynthesis;Penicillin-insensitive transglycosylase (EC 2.4.2.-) & transpeptidase PBP-1C;Penicillin-insensitive transglycosylase (EC 2.4.2.-) & transpeptidase PBP-1C	0.338	0.0491832	12.9571	0.0114874	0.025688
0.0304043	0.57	3.74	SEED;Respiration;Formate_hydrogenase;Formate dehydrogenase N gamma subunit (EC 1.2.1.2);Formate dehydrogenase N gamma subunit (EC 1.2.1.2)	0.339	0.0487837	13.0271	0.0111443	0.025688
0.0319939	0.57	2.2	SEED;Amino Acids and Derivatives;Alanine, serine, and glycine;Alanine_biosynthesis;Cysteine desulfurase CsdA-CsdE (EC 2.8.1.7), main protein CsdA;Cysteine desulfurase CsdA-CsdE (EC 2.8.1.7), main protein CsdA	0.34	0.0483867	12.9415	0.0115653	0.025688
0.0414187	0.578	4.08	SEED;Stress Response;Oxidative stress;Glutathione:_Non-redox_reactions;Probable glutathione S-transferase (EC 2.5.1.18), YfcG homolog;Probable glutathione S-transferase (EC 2.5.1.18), YfcG homolog	0.345	0.0456758	12.5404	0.013754	0.025688
0.0458364	0.582	1.96	SEED;Cell Wall and Capsule;Gram-Negative cell wall components;LOS_core_oligosaccharide_biosynthesis;Phosphoheptose isomerase (EC 5.3.1.-);Phosphoheptose isomerase (EC 5.3.1.-)	0.354	0.0416516	12.5222	0.0138626	0.025688
0.0458364	0.582	1.96	SEED;Cell Wall and Capsule;Capsular and extracellular polysacchrides;Capsular_heptose_biosynthesis;Phosphoheptose isomerase (EC 5.3.1.-);Phosphoheptose isomerase (EC 5.3.1.-)	0.354	0.0416516	12.5222	0.0138626	0.025688
0.0427193	0.578	3.21	SEED;Respiration;Biogenesis_of_c-type_cytochromes;Periplasmic thiol:disulfide oxidoreductase DsbB, required for DsbA reoxidation;Periplasmic thiol:disulfide oxidoreductase DsbB, required for DsbA reoxidation	0.356	0.0406029	12.714	0.012761	0.025688
0.0427193	0.578	3.21	SEED;Protein Metabolism;Protein folding;Periplasmic_disulfide_interchange;Periplasmic thiol:disulfide oxidoreductase DsbB, required for DsbA reoxidation;Periplasmic thiol:disulfide oxidoreductase DsbB, required for DsbA reoxidation	0.356	0.0406029	12.714	0.012761	0.025688
0.0359164	0.57	3.21	SEED;Carbohydrates;Sugar alcohols;Inositol_catabolism;Predicted transcriptional regulator of the myo-inositol catabolic operon;Predicted transcriptional regulator of the myo-inositol catabolic operon	0.357	0.0399152	13.0951	0.0108202	0.025688
0.0471413	0.582	2.03	SEED;Protein Metabolism;Protein degradation;Protein_degradation;Oligopeptidase A (EC 3.4.24.70);Oligopeptidase A (EC 3.4.24.70)	0.362	0.0379056	12.6545	0.0130932	0.025688
0.049125	0.582	1.6	SEED;Cell Wall and Capsule;Gram-Negative cell wall components;LOS_core_oligosaccharide_biosynthesis;D-glycero-D-manno-heptose 1,7-bisphosphate phosphatase (EC 3.1.1.-);D-glycero-D-manno-heptose 1,7-bisphosphate phosphatase (EC 3.1.1.-)	0.366	0.0362915	12.6591	0.0130673	0.025688
0.049125	0.582	1.6	SEED;Cell Wall and Capsule;Capsular and extracellular polysacchrides;Capsular_heptose_biosynthesis;D-glycero-D-manno-heptose 1,7-bisphosphate phosphatase (EC 3.1.1.-);D-glycero-D-manno-heptose 1,7-bisphosphate phosphatase (EC 3.1.1.-)	0.366	0.0362915	12.6591	0.0130673	0.025688
0.0521142	0.591	2.88	SEED;Clustering-based subsystems;Type III secretion system, extended;CBSS-243265.1.peg.3592;Surface presentation of antigens protein;Surface presentation of antigens protein	0.372	0.034122	12.6643	0.0130383	0.025688
0.0538209	0.591	3.85	SEED;Regulation and Cell signaling;Orphan_regulatory_proteins;Glycine cleavage system transcriptional activator GcvA;Glycine cleavage system transcriptional activator GcvA	0.374	0.0332237	12.6532	0.0131009	0.025688
0.0538209	0.591	3.85	SEED;Amino Acids and Derivatives;Alanine, serine, and glycine;Glycine_cleavage_system;Glycine cleavage system transcriptional activator GcvA;Glycine cleavage system transcriptional activator GcvA	0.374	0.0332237	12.6532	0.0131009	0.025688
0.0557345	0.591	3.12	SEED;Virulence;Type III, Type IV, Type VI, ESAT secretion systems;Type_4_secretion_and_conjugative_transfer;IncF plasmid conjugative transfer pilus assembly protein TraH;IncF plasmid conjugative transfer pilus assembly protein TraH	0.38	0.0309185	12.7271	0.0126891	0.025688
0.0607288	0.591	2.82	SEED;Miscellaneous;ZZ_gjo_need_homes;Virulence factor MviM;Virulence factor MviM	0.392	0.0269355	12.8313	0.0121302	0.025688
0.0916096	0.593	2.94	SEED;Virulence;Siderophore_Enterobactin;2,3-dihydro-2,3-dihydroxybenzoate dehydrogenase (EC 1.3.1.28) [enterobactin] siderophore;2,3-dihydro-2,3-dihydroxybenzoate dehydrogenase (EC 1.3.1.28) [enterobactin] siderophore	0.412	0.0210021	12.5067	0.0139554	0.025688
0.0874295	0.591	2.71	SEED;Virulence;Resistance to antibiotics and toxic compounds;Aminoglycoside_adenylyltransferases;Spectinomycin 9-O-adenylyltransferase;Spectinomycin 9-O-adenylyltransferase	0.413	0.0205931	12.6394	0.0131787	0.025688
0.0942952	0.597	1.52	SEED;Virulence;Invasion and intracellular resistance;Listeria_surface_proteins:_LPXTG_motif;Putative peptidoglycan bound protein (LPXTG motif) Lmo0842 homolog;Putative peptidoglycan bound protein (LPXTG motif) Lmo0842 homolog	0.414	0.0203909	12.508	0.0139477	0.025688
0.0919382	0.594	2.75	SEED;Virulence;Invasion and intracellular resistance;Salmonella_invasion_locus;Surface presentation of antigens protein SpaS;Surface presentation of antigens protein SpaS	0.416	0.0197941	12.618	0.0133012	0.025688
0.0797266	0.591	0.32	SEED;Metabolism of Aromatic Compounds;Metabolism of central aromatic intermediates;Protocatechuate_branch_of_beta-ketoadipate_pathway;putative acetyl-CoA:acetyltransferase;putative acetyl-CoA:acetyltransferase	-0.418	0.019404	12.9429	0.0115584	0.025688
0.0663588	0.591	2.21	SEED;DNA Metabolism;DNA repair;2-phosphoglycolate_salvage;Putative phosphatase YqaB;Putative phosphatase YqaB	0.411	0.0212091	13.132	0.0106485	0.025618
0.0426346	0.578	3.34	SEED;Virulence;Ton_and_Tol_transport_systems;iron-chelator utilization protein;iron-chelator utilization protein	0.377	0.0320549	13.1908	0.0103802	0.025155
0.0193356	0.57	4.48	SEED;Carbohydrates;Monosaccharides;D-Sorbitol(D-Glucitol)_and_L-Sorbose_Utilization;Putative transcriptional regulator of sorbose uptake and utilization genes;Putative transcriptional regulator of sorbose uptake and utilization genes	0.304	0.0698461	13.2145	0.0102737	0.02508
0.0133546	0.57	4.07	SEED;Virulence;Adhesion;Curli_production;Transcriptional regulator CsgD for 2nd curli operon;Transcriptional regulator CsgD for 2nd curli operon	0.27	0.0955762	13.3275	0.00978184	0.0249396
0.0140609	0.57	3.34	SEED;Secondary Metabolism;Aromatic amino acids and derivatives.1;Cinnamic_Acid_Degradation;Probable 3-phenylpropionic acid transporter;Probable 3-phenylpropionic acid transporter	0.296	0.0751921	13.7041	0.00830174	0.0249396
0.0174242	0.57	4.46	SEED;Metabolism of Aromatic Compounds;Metabolism of central aromatic intermediates;4-Hydroxyphenylacetic_acid_catabolic_pathway;Homoprotocatechuate degradative operon repressor;Homoprotocatechuate degradative operon repressor	0.303	0.0703679	13.4078	0.0094458	0.0249396
0.0149951	0.57	3.89	SEED;Cell Wall and Capsule;Capsular and extracellular polysacchrides;Colanic_acid_biosynthesis;Colanic acid biosysnthesis glycosyl transferase WcaI;Colanic acid biosysnthesis glycosyl transferase WcaI	0.304	0.0698461	13.723	0.00823373	0.0249396
0.0177806	0.57	2.52	SEED;Carbohydrates;Central carbohydrate metabolism;Methylglyoxal_Metabolism;Hydroxyacylglutathione hydrolase (EC 3.1.2.6);Hydroxyacylglutathione hydrolase (EC 3.1.2.6)	0.306	0.0682979	13.427	0.00936713	0.0249396
0.0170515	0.57	4.77	SEED;Virulence;Invasion and intracellular resistance;Salmonella_invasion_locus;Surface presentation of antigens protein SpaP;Surface presentation of antigens protein SpaP	0.312	0.0647833	13.6164	0.00862537	0.0249396
0.0170515	0.57	4.77	SEED;Clustering-based subsystems;Type III secretion system, extended;CBSS-243265.1.peg.3592;Surface presentation of antigens protein SpaP;Surface presentation of antigens protein SpaP	0.312	0.0647833	13.6164	0.00862537	0.0249396
0.0202919	0.57	4.18	SEED;Cofactors, Vitamins, Prosthetic Groups, Pigments;Quinone cofactors;Ubiquinone_Biosynthesis;2-octaprenyl-3-methyl-6-methoxy-1,4-benzoquinol hydroxylase (EC 1.14.13.-);2-octaprenyl-3-methyl-6-methoxy-1,4-benzoquinol hydroxylase (EC 1.14.13.-)	0.318	0.0609319	13.3911	0.00951495	0.0249396
0.0228739	0.57	4.18	SEED;RNA Metabolism;Transcription;Transcription_factors_bacterial;Regulator of nucleoside diphosphate kinase;Regulator of nucleoside diphosphate kinase	0.326	0.0559172	13.3233	0.00979958	0.0249396
0.0268319	0.57	4.84	SEED;Clustering-based subsystems;Type III secretion system, extended;CBSS-243265.1.peg.3592;Type III secretion apparatus protein;Type III secretion apparatus protein	0.338	0.0495852	13.2445	0.0101411	0.0249396
0.0234322	0.57	3.07	SEED;Stress Response;Universal_stress_protein_family;Universal stress protein E;Universal stress protein E	0.339	0.0491832	13.5317	0.00894991	0.0249396
0.0279075	0.57	2.21	SEED;Respiration;Electron donating reactions;Respiratory_dehydrogenases_1;Anaerobic glycerol-3-phosphate dehydrogenase subunit A (EC 1.1.99.5);Anaerobic glycerol-3-phosphate dehydrogenase subunit A (EC 1.1.99.5)	0.343	0.046823	13.2805	0.0099836	0.0249396
0.0280102	0.57	3.61	SEED;Virulence;Type III, Type IV, Type VI, ESAT secretion systems;Type_4_conjugative_transfer_system,_IncI1_type;IncI1 plasmid conjugative transfer inner membrane protein PilR;IncI1 plasmid conjugative transfer inner membrane protein PilR	0.345	0.0460557	13.3062	0.00987272	0.0249396
0.0293585	0.57	2.66	SEED;DNA Metabolism;DNA_structural_proteins,_bacterial;Integration host factor beta subunit;Integration host factor beta subunit	0.346	0.0452981	13.2453	0.0101373	0.0249396
0.0276997	0.57	2.61	SEED;Respiration;Electron donating reactions;Succinate_dehydrogenase;Fumarate reductase subunit C;Fumarate reductase subunit C	0.347	0.0449229	13.3783	0.00956799	0.0249396
0.0340911	0.57	2.31	SEED;Carbohydrates;Central carbohydrate metabolism;Pyruvate_metabolism_II:_acetyl-CoA,_acetogenesis_from_pyruvate;Pyruvate dehydrogenase E1 component (EC 1.2.4.1);Pyruvate dehydrogenase E1 component (EC 1.2.4.1)	0.37	0.0347312	13.4777	0.00916299	0.0249396
0.0379239	0.576	2.53	SEED;Amino Acids and Derivatives;Arginine; urea cycle, polyamines;Arginine_and_Ornithine_Degradation;Arginine ABC transporter, permease protein ArtQ;Arginine ABC transporter, permease protein ArtQ	0.371	0.0344255	13.2823	0.00997589	0.0249396
0.0338324	0.57	2.03	SEED;DNA Metabolism;DNA_structural_proteins,_bacterial;DNA-binding protein Fis;DNA-binding protein Fis	0.371	0.0344255	13.5106	0.00903258	0.0249396
0.0383015	0.576	2.61	SEED;Carbohydrates;Monosaccharides;Hexose_Phosphate_Uptake_System;Hexose phosphate uptake regulatory protein UhpC;Hexose phosphate uptake regulatory protein UhpC	0.376	0.032344	13.3872	0.00953101	0.0249396
0.0481676	0.582	2.85	SEED;RNA Metabolism;RNA processing and modification;RNA_processing_and_degradation,_bacterial;Ribonuclease E inhibitor RraB;Ribonuclease E inhibitor RraB	0.392	0.0269355	13.2948	0.00992187	0.0249396
0.0502155	0.588	2.8	SEED;Regulation and Cell signaling;DNA-binding_regulatory_proteins,_strays;Nitrogen assimilation regulatory protein Nac;Nitrogen assimilation regulatory protein Nac	0.394	0.02619	13.2676	0.0100396	0.0249396
0.0506116	0.589	2.2	SEED;Cofactors, Vitamins, Prosthetic Groups, Pigments;Quinone cofactors;Pyrroloquinoline_Quinone_biosynthesis;Coenzyme PQQ synthesis protein C;Coenzyme PQQ synthesis protein C	0.398	0.0249838	13.3462	0.00970241	0.0249396
0.0506116	0.589	2.2	SEED;Cofactors, Vitamins, Prosthetic Groups, Pigments;Quinone cofactors;Coenzyme_PQQ_synthesis;Coenzyme PQQ synthesis protein C;Coenzyme PQQ synthesis protein C	0.398	0.0249838	13.3462	0.00970241	0.0249396
0.0540961	0.591	2.17	SEED;Amino Acids and Derivatives;Arginine; urea cycle, polyamines;Arginine_and_Ornithine_Degradation;Arginine ABC transporter, periplasmic arginine-binding protein ArtI;Arginine ABC transporter, periplasmic arginine-binding protein ArtI	0.402	0.023595	13.3274	0.00978196	0.0249396
0.0487571	0.582	2.72	SEED;Amino Acids and Derivatives;Lysine, threonine, methionine, and cysteine.1;Methionine_Biosynthesis;Transcriptional activator MetR;Transcriptional activator MetR	0.406	0.0224853	13.6316	0.0085686	0.0249396
0.0638087	0.591	2.32	SEED;Virulence;Ton_and_Tol_transport_systems;Tol biopolymer transport system, TolR protein;Tol biopolymer transport system, TolR protein	0.417	0.0195983	13.3684	0.00960939	0.0249396
0.0895449	0.591	1.36	SEED;Respiration;Electron donating reactions;Hydrogenases;Ni,Fe-hydrogenase maturation factor;Ni,Fe-hydrogenase maturation factor	0.439	0.0145635	13.2845	0.00996616	0.0249396
0.0925999	0.597	1.93	SEED;Amino Acids and Derivatives;Lysine, threonine, methionine, and cysteine.1;Cysteine_Biosynthesis;Phosphoadenylyl-sulfate reductase [thioredoxin] (EC 1.8.4.8);Phosphoadenylyl-sulfate reductase [thioredoxin] (EC 1.8.4.8)	0.456	0.0114927	13.691	0.00834934	0.0249396
0.0441507	0.58	1.97	SEED;Cofactors, Vitamins, Prosthetic Groups, Pigments;Riboflavin, FMN, FAD;Riboflavin,_FMN_and_FAD_metabolism;GTP cyclohydrolase II (EC 3.5.4.25);GTP cyclohydrolase II (EC 3.5.4.25)	0.404	0.0229241	13.7914	0.00799137	0.0247956
0.0093881	0.57	5.3	SEED;Clustering-based subsystems;CBSS-214092.1.peg.3450;FIG002208: Acetyltransferase (EC 2.3.1.-);FIG002208: Acetyltransferase (EC 2.3.1.-)	0.267	0.0982059	13.978	0.00736559	0.0246319
0.0065815	0.57	6.7	SEED;Cell Wall and Capsule;Capsular and extracellular polysacchrides;Sialic_Acid_Metabolism;N-acetylneuraminic acid outer membrane channel protein NanC;N-acetylneuraminic acid outer membrane channel protein NanC	0.267	0.0982059	14.6884	0.0053932	0.0246319
0.010159	0.57	4.08	SEED;Secondary Metabolism;Plant Hormones;Auxin_biosynthesis;Monoamine oxidase (1.4.3.4);Monoamine oxidase (1.4.3.4)	0.27	0.0955762	13.8745	0.00770672	0.0246319
0.010159	0.57	4.08	SEED;Metabolism of Aromatic Compounds;Aromatic_Amin_Catabolism;Monoamine oxidase (1.4.3.4);Monoamine oxidase (1.4.3.4)	0.27	0.0955762	13.8745	0.00770672	0.0246319
0.010159	0.57	4.08	SEED;Amino Acids and Derivatives;Lysine, threonine, methionine, and cysteine.1;Threonine_degradation;Monoamine oxidase (1.4.3.4);Monoamine oxidase (1.4.3.4)	0.27	0.0955762	13.8745	0.00770672	0.0246319
0.010159	0.57	4.08	SEED;Amino Acids and Derivatives;Alanine, serine, and glycine;Glycine_and_Serine_Utilization;Monoamine oxidase (1.4.3.4);Monoamine oxidase (1.4.3.4)	0.27	0.0955762	13.8745	0.00770672	0.0246319
0.0024433	0.57	4.1	SEED;Virulence;Type III, Type IV, Type VI, ESAT secretion systems;Type_4_secretion_and_conjugative_transfer;IncF plasmid conjugative transfer protein TrbJ;IncF plasmid conjugative transfer protein TrbJ	0.276	0.0910934	16.8206	0.00209443	0.0246319
0.0087856	0.57	3.1	SEED;Cofactors, Vitamins, Prosthetic Groups, Pigments;Lipoic acid;Lipoic_acid_metabolism;Proposed lipoate regulatory protein YbeD;Proposed lipoate regulatory protein YbeD	0.289	0.0802513	14.5145	0.00582181	0.0246319
0.0108278	0.57	4.35	SEED;Cell Wall and Capsule;Capsular and extracellular polysacchrides;Colanic_acid_biosynthesis;Colanic acid biosynthesis glycosyl transferase WcaC;Colanic acid biosynthesis glycosyl transferase WcaC	0.29	0.0796774	14.1108	0.00694965	0.0246319
0.0116841	0.57	2.2	SEED;Virulence;Invasion and intracellular resistance;Salmonella_invasion_locus;Chaperone protein SicA (Salmonella invasin chaperone);Chaperone protein SicA (Salmonella invasin chaperone)	0.292	0.0785385	13.9874	0.00733543	0.0246319
0.0027794	0.57	3.26	SEED;Virulence;Ton_and_Tol_transport_systems;TonB-dependent siderophore receptor;TonB-dependent siderophore receptor	0.291	0.0785385	16.8594	0.00205841	0.0246319
0.0119596	0.57	3.72	SEED;Phosphorus Metabolism;Alkylphosphonate_utilization;PhnH protein;PhnH protein	0.293	0.0774114	13.9697	0.00739244	0.0246319
0.007385	0.57	4.12	SEED;Stress Response;Oxidative stress;Oxidative_stress;Paraquat-inducible protein A;Paraquat-inducible protein A	0.298	0.0740999	15.0213	0.00465726	0.0246319
0.0053409	0.57	4.18	SEED;Cell Wall and Capsule;Gram-Negative cell wall components;KDO2-Lipid_A_biosynthesis;LptA, protein essential for LPS transport across the periplasm;LptA, protein essential for LPS transport across the periplasm	0.301	0.0719502	15.7283	0.0034063	0.0246319
0.0144023	0.57	3.51	SEED;Amino Acids and Derivatives;Lysine, threonine, methionine, and cysteine.1;Cysteine_Biosynthesis;Sulfate transporter, CysZ-type;Sulfate transporter, CysZ-type	0.306	0.0688112	13.8335	0.00784581	0.0246319
0.005821	0.57	3.18	SEED;Respiration;Formate_hydrogenase;Formate hydrogenlyase subunit 3;Formate hydrogenlyase subunit 3	0.305	0.0688112	15.6453	0.00353392	0.0246319
0.0042315	0.57	4.12	SEED;Amino Acids and Derivatives;Lysine, threonine, methionine, and cysteine.1;Cysteine_Biosynthesis;Sulfite reductase [NADPH] flavoprotein alpha-component (EC 1.8.1.2);Sulfite reductase [NADPH] flavoprotein alpha-component (EC 1.8.1.2)	0.305	0.0688112	16.2832	0.0026618	0.0246319
0.0053021	0.57	4.48	SEED;Motility and Chemotaxis;Bacterial_Chemotaxis;Aerotaxis sensor receptor protein;Aerotaxis sensor receptor protein	0.309	0.0667749	15.8922	0.00316734	0.0246319
0.0134638	0.57	4.36	SEED;Virulence;Ton_and_Tol_transport_systems;Putative Ton-B dependent hemine receptor;Putative Ton-B dependent hemine receptor	0.31	0.0657736	14.0586	0.00711044	0.0246319
0.0091605	0.57	3.35	SEED;Regulation and Cell signaling;Programmed Cell Death and Toxin-antitoxin Systems;Murein_hydrolase_regulation_and_cell_death;tRNA-dihydrouridine synthase C (EC 1.-.-.-);tRNA-dihydrouridine synthase C (EC 1.-.-.-)	0.311	0.0652771	14.8439	0.00503609	0.0246319
0.0073683	0.57	3.03	SEED;Nitrogen Metabolism;Nitrate_and_nitrite_ammonification;Nitrate/nitrite sensor protein (EC 2.7.3.-);Nitrate/nitrite sensor protein (EC 2.7.3.-)	0.311	0.0652771	15.2794	0.00415552	0.0246319
0.0147753	0.57	3.53	SEED;Regulation and Cell signaling;DNA-binding_regulatory_proteins,_strays;LysR family transcriptional regulator YhjC;LysR family transcriptional regulator YhjC	0.312	0.0642923	13.9182	0.00756066	0.0246319
0.0138286	0.57	2.69	SEED;Respiration;Formate_hydrogenase;Formate dehydrogenase O beta subunit (EC 1.2.1.2);Formate dehydrogenase O beta subunit (EC 1.2.1.2)	0.312	0.0642923	14.0507	0.0071351	0.0246319
0.0111233	0.57	5.08	SEED;Cofactors, Vitamins, Prosthetic Groups, Pigments;Quinone cofactors;Ubiquinone_Biosynthesis;NAD(P)H-flavin reductase (EC 1.5.1.29) (EC 1.16.1.3);NAD(P)H-flavin reductase (EC 1.5.1.29) (EC 1.16.1.3)	0.314	0.0628358	14.5319	0.00577741	0.0246319
0.0084934	0.57	4.06	SEED;Amino Acids and Derivatives;Alanine, serine, and glycine;Alanine_biosynthesis;HTH-type transcriptional regulator IlvY;HTH-type transcriptional regulator IlvY	0.314	0.0628358	15.0714	0.00455541	0.0246319
0.0140065	0.57	4.36	SEED;Metabolism of Aromatic Compounds;Peripheral pathways for catabolism of aromatic compounds;Benzoate_degradation;Benzoate transport protein;Benzoate transport protein	0.319	0.0599962	14.1634	0.00679136	0.0246319
0.0094568	0.57	4.23	SEED;Cell Wall and Capsule;Capsular and extracellular polysacchrides;Colanic_acid_biosynthesis;Colanic acid biosysnthesis protein WcaK;Colanic acid biosysnthesis protein WcaK	0.321	0.0586127	14.9957	0.00471025	0.0246319
0.0153374	0.57	3.67	SEED;Virulence;Type III, Type IV, Type VI, ESAT secretion systems;Type_4_secretion_and_conjugative_transfer;IncF plasmid conjugative transfer surface exclusion protein TraT;IncF plasmid conjugative transfer surface exclusion protein TraT	0.326	0.0559172	14.1227	0.00691361	0.0246319
0.0173025	0.57	4.24	SEED;Carbohydrates;Aminosugars;Chitin_and_N-acetylglucosamine_utilization;N-acetylglucosamine-regulated outer membrane porin;N-acetylglucosamine-regulated outer membrane porin	0.328	0.0546048	13.9291	0.00752489	0.0246319
0.0173976	0.57	4.23	SEED;Stress Response;Osmotic stress;Choline_and_Betaine_Uptake_and_Betaine_Biosynthesis;HTH-type transcriptional regulator BetI;HTH-type transcriptional regulator BetI	0.335	0.0512179	14.0462	0.00714912	0.0246319
0.0198787	0.57	3.86	SEED;Carbohydrates;Di- and oligosaccharides;Maltose_and_Maltodextrin_Utilization;Transcriptional activator of maltose regulon, MalT;Transcriptional activator of maltose regulon, MalT	0.337	0.0499896	13.8281	0.00786441	0.0246319
0.005229	0.57	4.58	SEED;Stress Response;Oxidative stress;Oxidative_stress;Fumarate and nitrate reduction regulatory protein;Fumarate and nitrate reduction regulatory protein	0.337	0.0499896	16.499	0.00241777	0.0246319
0.0060599	0.57	5.93	SEED;Carbohydrates;Monosaccharides;D-gluconate_and_ketogluconates_metabolism;Glucose dehydrogenase, PQQ-dependent (EC 1.1.5.2);Glucose dehydrogenase, PQQ-dependent (EC 1.1.5.2)	0.339	0.0487837	16.2528	0.00269799	0.0246319
0.0071491	0.57	4.47	SEED;Amino Acids and Derivatives;Alanine, serine, and glycine;Glycine_and_Serine_Utilization;L-serine dehydratase 1 (EC 4.3.1.17);L-serine dehydratase 1 (EC 4.3.1.17)	0.346	0.0456758	16.0539	0.00294767	0.0246319
0.009752	0.57	3.7	SEED;RNA Metabolism;Transcription;Transcription_initiation,_bacterial_sigma_factors;Sigma factor RpoE negative regulatory protein RseA;Sigma factor RpoE negative regulatory protein RseA	0.348	0.0441795	15.4996	0.00376974	0.0246319
0.0150021	0.57	2.63	SEED;RNA Metabolism;RNA processing and modification;ATP-dependent_RNA_helicases,_bacterial;ATP-dependent RNA helicase SrmB;ATP-dependent RNA helicase SrmB	0.362	0.038235	14.9271	0.00485475	0.0246319
0.0230663	0.57	1.77	SEED;Amino Acids and Derivatives;Histidine Metabolism;Histidine_Degradation;N-formylglutamate deformylase (EC 3.5.1.68);N-formylglutamate deformylase (EC 3.5.1.68)	0.361	0.038235	14.0668	0.00708496	0.0246319
0.0106477	0.57	4.34	SEED;Regulation and Cell signaling;Programmed Cell Death and Toxin-antitoxin Systems;Toxin-antitoxin_replicon_stabilization_systems;RelB protein (antitoxin to RelE);RelB protein (antitoxin to RelE)	0.361	0.038235	15.6128	0.00358522	0.0246319
0.0183792	0.57	4.15	SEED;DNA Metabolism;DNA replication;DNA-replication;Primosomal protein I;Primosomal protein I	0.364	0.0372535	14.5731	0.0056737	0.0246319
0.0143742	0.57	4.11	SEED;Metabolism of Aromatic Compounds;Metabolism of central aromatic intermediates;4-Hydroxyphenylacetic_acid_catabolic_pathway;2-oxo-hepta-3-ene-1,7-dioic acid hydratase (EC 4.2.-.-);2-oxo-hepta-3-ene-1,7-dioic acid hydratase (EC 4.2.-.-)	0.364	0.0372535	15.0647	0.00456897	0.0246319
0.0143742	0.57	4.11	SEED;Metabolism of Aromatic Compounds;Benzoate_transport_and_degradation_cluster;2-oxo-hepta-3-ene-1,7-dioic acid hydratase (EC 4.2.-.-);2-oxo-hepta-3-ene-1,7-dioic acid hydratase (EC 4.2.-.-)	0.364	0.0372535	15.0647	0.00456897	0.0246319
0.0143742	0.57	4.11	SEED;Amino Acids and Derivatives;Aromatic amino acids and derivatives;Aromatic_amino_acid_degradation;2-oxo-hepta-3-ene-1,7-dioic acid hydratase (EC 4.2.-.-);2-oxo-hepta-3-ene-1,7-dioic acid hydratase (EC 4.2.-.-)	0.364	0.0372535	15.0647	0.00456897	0.0246319
0.0254634	0.57	1.67	SEED;Cofactors, Vitamins, Prosthetic Groups, Pigments;Quinone cofactors;Menaquinone_and_Phylloquinone_Biosynthesis;O-succinylbenzoic acid--CoA ligase (EC 6.2.1.26);O-succinylbenzoic acid--CoA ligase (EC 6.2.1.26)	0.369	0.0350391	14.0436	0.00715716	0.0246319
0.0243465	0.57	2.08	SEED;Amino Acids and Derivatives;Alanine, serine, and glycine;Alanine_biosynthesis;Cysteine desulfurase (EC 2.8.1.7), IscS subfamily;Cysteine desulfurase (EC 2.8.1.7), IscS subfamily	0.371	0.0344255	14.1686	0.00677581	0.0246319
0.0099028	0.57	5.52	SEED;Virulence;Type III, Type IV, Type VI, ESAT secretion systems;Type_4_secretion_and_conjugative_transfer;IncF plasmid conjugative transfer pilus assembly protein TraW;IncF plasmid conjugative transfer pilus assembly protein TraW	0.372	0.034122	15.9855	0.00303868	0.0246319
0.0173192	0.57	5.06	SEED;Virulence;Adhesion;Curli_production;Minor curlin subunit CsgB, nucleation component of curlin monomers;Minor curlin subunit CsgB, nucleation component of curlin monomers	0.374	0.0332237	14.9209	0.0048682	0.0246319
0.0252675	0.57	3.65	SEED;Nucleosides and Nucleotides;Detoxification.1;Nudix_proteins_(nucleoside_triphosphate_hydrolases);Nudix-like NDP and NTP phosphohydrolase YmfB;Nudix-like NDP and NTP phosphohydrolase YmfB	0.377	0.0320549	14.2371	0.00657558	0.0246319
0.0171933	0.57	2.97	SEED;Membrane Transport;Choline_Transport;Sodium-Choline Symporter;Sodium-Choline Symporter	0.38	0.0309185	15.0793	0.00453959	0.0246319
0.0147154	0.57	3.12	SEED;Protein Metabolism;Secretion;Twin-arginine_translocation_system;Twin-arginine translocation protein TatB;Twin-arginine translocation protein TatB	0.38	0.0309185	15.3905	0.00395615	0.0246319
0.0201805	0.57	2.83	SEED;Carbohydrates;Monosaccharides;D-ribose_utilization;Ribose/xylose/arabinose/galactoside ABC-type transport systems, ATP-binding protein (EC 3.6.3.17);Ribose/xylose/arabinose/galactoside ABC-type transport systems, ATP-binding protein (EC 3.6.3.17)	0.38	0.0306393	14.777	0.00518675	0.0246319
0.0259508	0.57	3.05	SEED;RNA Metabolism;RNA processing and modification;tRNA_processing;Ribonuclease T (EC 3.1.13.-);Ribonuclease T (EC 3.1.13.-)	0.382	0.0303622	14.2922	0.00641851	0.0246319
0.020252	0.57	5.59	SEED;Cell Wall and Capsule;Gram-Negative cell wall components;KDO2-Lipid_A_biosynthesis;Lipid A-core:surface polymer ligase WaaL;Lipid A-core:surface polymer ligase WaaL	0.384	0.0295426	14.8428	0.00503851	0.0246319
0.0180301	0.57	3.47	SEED;Protein Metabolism;Protein folding;Peptidyl-prolyl_cis-trans_isomerase;Peptidyl-prolyl cis-trans isomerase ppiA precursor (EC 5.2.1.8);Peptidyl-prolyl cis-trans isomerase ppiA precursor (EC 5.2.1.8)	0.385	0.0292733	15.0936	0.004511	0.0246319
0.0285167	0.57	4.51	SEED;Virulence;Type III, Type IV, Type VI, ESAT secretion systems;Type_4_secretion_and_conjugative_transfer;IncF plasmid conjugative transfer DNA-nicking and unwinding protein TraI;IncF plasmid conjugative transfer DNA-nicking and unwinding protein TraI	0.386	0.0290059	14.195	0.00669789	0.0246319
0.0176204	0.57	2.17	SEED;Carbohydrates;Central carbohydrate metabolism;Pyruvate_metabolism_I:_anaplerotic_reactions,_PEP;Malate Na(+) symporter;Malate Na(+) symporter	0.4	0.0245139	15.4944	0.00377831	0.0246319
0.0301163	0.57	2.52	SEED;Protein Metabolism;Protein folding;Protein_chaperones;Chaperone protein HscA;Chaperone protein HscA	0.403	0.0233697	14.518	0.00581276	0.0246319
0.0189965	0.57	2.41	SEED;DNA Metabolism;DNA_structural_proteins,_bacterial;Chromosome partition protein MukB;Chromosome partition protein MukB	0.403	0.0233697	15.4396	0.0038711	0.0246319
0.0189965	0.57	2.41	SEED;Cell Division and Cell Cycle;Cell cycle in Prokaryota;MukBEF_Chromosome_Condensation;Chromosome partition protein MukB;Chromosome partition protein MukB	0.403	0.0233697	15.4396	0.0038711	0.0246319
0.0102309	0.57	2.82	SEED;Miscellaneous;ZZ_gjo_need_homes;Tyrosine-specific transport protein;Tyrosine-specific transport protein	0.406	0.0224853	16.7545	0.00215718	0.0246319
0.022102	0.57	4.73	SEED;Cell Wall and Capsule;Capsular and extracellular polysacchrides;Rhamnose_containing_glycans;Capsular polysaccharide export system protein KpsC;Capsular polysaccharide export system protein KpsC	0.411	0.0212091	15.3308	0.00406202	0.0246319
0.0176538	0.57	2.34	SEED;Miscellaneous;Muconate_lactonizing_enzyme_family;O-succinylbenzoate-CoA synthase (EC 4.2.1.-);O-succinylbenzoate-CoA synthase (EC 4.2.1.-)	0.411	0.0212091	15.7803	0.00332865	0.0246319
0.0176538	0.57	2.34	SEED;Cofactors, Vitamins, Prosthetic Groups, Pigments;Quinone cofactors;Menaquinone_and_Phylloquinone_Biosynthesis;O-succinylbenzoate-CoA synthase (EC 4.2.1.-);O-succinylbenzoate-CoA synthase (EC 4.2.1.-)	0.411	0.0212091	15.7803	0.00332865	0.0246319
0.0367983	0.575	2.16	SEED;Fatty Acids, Lipids, and Isoprenoids;Phospholipids;Glycerolipid_and_Glycerophospholipid_Metabolism_in_Bacteria;Glycerol-3-phosphate acyltransferase (EC 2.3.1.15);Glycerol-3-phosphate acyltransferase (EC 2.3.1.15)	0.411	0.0210021	14.3309	0.00631059	0.0246319
0.0233158	0.57	2.26	SEED;Clustering-based subsystems;Bacterial_Cell_Division;Cell division protein FtsJ;Cell division protein FtsJ	0.414	0.0203909	15.3026	0.00411308	0.0246319
0.0203811	0.57	2.53	SEED;Cell Division and Cell Cycle;Cell cycle in Prokaryota;Bacterial_Cytoskeleton;Cell division protein ZipA;Cell division protein ZipA	0.414	0.0201904	15.5914	0.00361945	0.0246319
0.0367873	0.575	3.56	SEED;RNA Metabolism;Transcription;Transcription_initiation,_bacterial_sigma_factors;RNA polymerase sigma factor RpoS;RNA polymerase sigma factor RpoS	0.418	0.019404	14.4898	0.00588538	0.0246319
0.028703	0.57	4.22	SEED;Virulence;Type III, Type IV, Type VI, ESAT secretion systems;Type_4_secretion_and_conjugative_transfer;IncF plasmid conjugative transfer pilus assembly protein TraC;IncF plasmid conjugative transfer pilus assembly protein TraC	0.422	0.0184559	15.0862	0.00452564	0.0246319
0.0323752	0.57	1.97	SEED;Cofactors, Vitamins, Prosthetic Groups, Pigments;Folate and pterines;Folate_Biosynthesis;Dihydroneopterin aldolase (EC 4.1.2.25);Dihydroneopterin aldolase (EC 4.1.2.25)	0.424	0.0179053	14.906	0.0049001	0.0246319
0.035747	0.57	2.56	SEED;Carbohydrates;Central carbohydrate metabolism;Pyruvate_Alanine_Serine_Interconversions;Alanine racemase, biosynthetic (EC 5.1.1.1);Alanine racemase, biosynthetic (EC 5.1.1.1)	0.429	0.0168435	14.8302	0.00506677	0.0246319
0.0228486	0.57	2.92	SEED;RNA Metabolism;RNA processing and modification;RNA_processing_and_degradation,_bacterial;Exoribonuclease II (EC 3.1.13.1);Exoribonuclease II (EC 3.1.13.1)	0.433	0.0159982	15.8283	0.00325845	0.0246319
0.0533245	0.591	1.89	SEED;Virulence;Resistance to antibiotics and toxic compounds;Copper_homeostasis:_copper_tolerance;Membrane protein, suppressor for copper-sensitivity ScsD;Membrane protein, suppressor for copper-sensitivity ScsD	0.434	0.0156699	14.1747	0.00675774	0.0246319
0.0635179	0.591	3.57	SEED;RNA Metabolism;RNA processing and modification;RNA_processing_and_degradation,_bacterial;Ribonuclease I precursor (EC 3.1.27.6);Ribonuclease I precursor (EC 3.1.27.6)	0.436	0.015347	13.8665	0.00773345	0.0246319
0.0492034	0.582	2.7	SEED;Cell Wall and Capsule;Capsular and extracellular polysacchrides;Rhamnose_containing_glycans;Polysialic acid transport protein KpsM;Polysialic acid transport protein KpsM	0.436	0.0151877	14.3981	0.00612705	0.0246319
0.0645476	0.591	3	SEED;Virulence;Type III, Type IV, Type VI, ESAT secretion systems;Type_4_secretion_and_conjugative_transfer;IncF plasmid conjugative transfer protein TraG;IncF plasmid conjugative transfer protein TraG	0.444	0.0136665	14.0663	0.00708637	0.0246319
0.0540319	0.591	2.6	SEED;Amino Acids and Derivatives;Arginine; urea cycle, polyamines;Arginine_and_Ornithine_Degradation;Arginine ABC transporter, ATP-binding protein ArtP;Arginine ABC transporter, ATP-binding protein ArtP	0.444	0.0136665	14.422	0.00606322	0.0246319
0.0645866	0.591	2.67	SEED;Virulence;Type III, Type IV, Type VI, ESAT secretion systems;Type_4_conjugative_transfer_system,_IncI1_type;IncI1 plasmid conjugative transfer protein PilM;IncI1 plasmid conjugative transfer protein PilM	0.447	0.0129539	14.1722	0.00676523	0.0246319
0.0160605	0.57	3.96	SEED;Membrane Transport;ABC transporters;ABC_transporter_alkylphosphonate_(TC_3.A.1.9.1);Phosphonate ABC transporter permease protein phnE (TC 3.A.1.9.1);Phosphonate ABC transporter permease protein phnE (TC 3.A.1.9.1)	0.452	0.0121391	17.0854	0.00186045	0.0246319
0.0626157	0.591	1.99	SEED;Miscellaneous;ZZ_gjo_need_homes;Na+/H+ antiporter NhaB;Na+/H+ antiporter NhaB	0.456	0.0116196	14.4516	0.00598484	0.0246319
0.0703715	0.591	2.32	SEED;DNA Metabolism;DNA repair;DNA_repair,_bacterial_UvrD_and_related_helicases;DNA helicase IV;DNA helicase IV	0.459	0.010996	14.3284	0.00631749	0.0246319
0.0528955	0.591	2.05	SEED;Nitrogen Metabolism;Ammonia_assimilation;Glutamate-ammonia-ligase adenylyltransferase (EC 2.7.7.42);Glutamate-ammonia-ligase adenylyltransferase (EC 2.7.7.42)	0.468	0.00961085	15.1686	0.00436401	0.0246319
0.0510718	0.59	2.29	SEED;Carbohydrates;CO2 fixation;Calvin-Benson_cycle;Phosphoribulokinase (EC 2.7.1.19);Phosphoribulokinase (EC 2.7.1.19)	0.468	0.00961085	15.2388	0.00423077	0.0246319
0.0763781	0.591	2.58	SEED;Virulence;Iron Scavenging Mechanisms;Hemin_transport_system;Hemin transport protein HmuS;Hemin transport protein HmuS	0.49	0.0069304	15.0878	0.00452255	0.0246319
0.0763781	0.591	2.58	SEED;Virulence;Iron Scavenging Mechanisms;Heme,_hemin_uptake_and_utilization_systems_in_GramPositives;Hemin transport protein HmuS;Hemin transport protein HmuS	0.49	0.0069304	15.0878	0.00452255	0.0246319
0.0232002	0.57	3.22	SEED;Virulence;Ton_and_Tol_transport_systems;TonB-dependent hemin , ferrichrome receptor;TonB-dependent hemin , ferrichrome receptor	0.494	0.0065245	17.5916	0.00148279	0.0246319
0.0232002	0.57	3.22	SEED;Virulence;Iron Scavenging Mechanisms;Hemin_transport_system;TonB-dependent hemin , ferrichrome receptor;TonB-dependent hemin , ferrichrome receptor	0.494	0.0065245	17.5916	0.00148279	0.0246319
0.0858118	0.591	1.51	SEED;Cell Wall and Capsule;Gram-Negative cell wall components;LOS_core_oligosaccharide_biosynthesis;ADP-L-glycero-D-manno-heptose-6-epimerase (EC 5.1.3.20);ADP-L-glycero-D-manno-heptose-6-epimerase (EC 5.1.3.20)	0.499	0.0060638	15.122	0.00445469	0.0246319
0.0749949	0.591	2.89	SEED;Cell Wall and Capsule;Capsular and extracellular polysacchrides;Colanic_acid_biosynthesis;Colanic acid polymerase WcaD;Colanic acid polymerase WcaD	0.501	0.005772	15.4901	0.00378548	0.0246319
0.0484124	0.582	2.66	SEED;Virulence;Quorum sensing and biofilm formation;Autoinducer_2_(AI-2)_transport_and_processing_(lsrACDBFGE_operon);Autoinducer 2 (AI-2) aldolase LsrF (EC 4.2.1.-);Autoinducer 2 (AI-2) aldolase LsrF (EC 4.2.1.-)	0.529	0.00363435	17.2906	0.00169707	0.0246319
0.0712056	0.591	2.14	SEED;Fatty Acids, Lipids, and Isoprenoids;Phospholipids;Glycerolipid_and_Glycerophospholipid_Metabolism_in_Bacteria;Phosphatidylglycerophosphatase A (EC 3.1.3.27);Phosphatidylglycerophosphatase A (EC 3.1.3.27)	0.538	0.00313315	16.8158	0.00209888	0.0246319
0.0016991	0.57	6.81	SEED;Virulence;Type III, Type IV, Type VI, ESAT secretion systems;Type_4_secretion_and_conjugative_transfer;IncF plasmid conjugative transfer protein TrbB;IncF plasmid conjugative transfer protein TrbB	0.3	0.0724833	18.0041	0.00123182	0.0242332
0.0019182	0.57	3.3	SEED;DNA Metabolism;DNA replication;DNA-replication;Exodeoxyribonuclease V gamma chain (EC 3.1.11.5);Exodeoxyribonuclease V gamma chain (EC 3.1.11.5)	0.313	0.0638041	18.0166	0.00122491	0.0242332
0.0027634	0.57	4.3	SEED;Virulence;Type III, Type IV, Type VI, ESAT secretion systems;Type_4_conjugative_transfer_system,_IncI1_type;Plasmid conjugative transfer endonuclease;Plasmid conjugative transfer endonuclease	0.349	0.0438114	18.0383	0.001213	0.0242332
0.0018228	0.57	3.63	SEED;DNA Metabolism;DNA repair;DNA_Repair_Base_Excision;Exodeoxyribonuclease I (EC 3.1.11.1);Exodeoxyribonuclease I (EC 3.1.11.1)	0.353	0.0420058	18.9547	0.000802231	0.0242332
0.0026002	0.57	5.93	SEED;Virulence;Iron Scavenging Mechanisms;Hemin_transport_system;Periplasmic hemin-binding protein;Periplasmic hemin-binding protein	0.36	0.0392364	18.3806	0.00103964	0.0242332
0.0017554	0.57	4.62	SEED;Virulence;Type III, Type IV, Type VI, ESAT secretion systems;Type_4_secretion_and_conjugative_transfer;IncF plasmid conjugative transfer pilus assembly protein TraB;IncF plasmid conjugative transfer pilus assembly protein TraB	0.363	0.0375784	19.2528	0.000700971	0.0242332
0.0013398	0.57	3.42	SEED;Potassium metabolism;Glutathione-regulated_potassium-efflux_system_and_associated_functions;Glutathione-regulated potassium-efflux system ATP-binding protein;Glutathione-regulated potassium-efflux system ATP-binding protein	0.398	0.024748	20.6285	0.00037515	0.0242332
0.0013398	0.57	3.42	SEED;Membrane Transport;Potassium_homeostasis;Glutathione-regulated potassium-efflux system ATP-binding protein;Glutathione-regulated potassium-efflux system ATP-binding protein	0.398	0.024748	20.6285	0.00037515	0.0242332
0.0051869	0.57	3.62	SEED;Respiration;Soluble_cytochromes_and_functionally_related_electron_carriers;Ferredoxin, 2Fe-2S;Ferredoxin, 2Fe-2S	0.404	0.0231461	18.0551	0.00120387	0.0242332
0.0064629	0.57	5.95	SEED;Virulence;Ton_and_Tol_transport_systems;Type I secretion outer membrane protein, TolC precursor;Type I secretion outer membrane protein, TolC precursor	0.418	0.0192113	17.9879	0.00124086	0.0242332
0.0064629	0.57	5.95	SEED;Virulence;Resistance to antibiotics and toxic compounds;Multidrug_Resistance_Efflux_Pumps;Type I secretion outer membrane protein, TolC precursor;Type I secretion outer membrane protein, TolC precursor	0.418	0.0192113	17.9879	0.00124086	0.0242332
0.0081625	0.57	5.23	SEED;Virulence;Type III, Type IV, Type VI, ESAT secretion systems;Type_4_secretion_and_conjugative_transfer;IncF plasmid conjugative transfer pilus assembly protein TraU;IncF plasmid conjugative transfer pilus assembly protein TraU	0.474	0.00887165	19.0662	0.000762753	0.0242332
0.0132606	0.57	3.65	SEED;Cofactors, Vitamins, Prosthetic Groups, Pigments;Thiamin_biosynthesis;Thiamin ABC transporter, substrate-binding component;Thiamin ABC transporter, substrate-binding component	0.492	0.0067656	18.6377	0.000925766	0.0242332
0.0217248	0.57	2.25	SEED;Protein Metabolism;Protein folding;Peptidyl-prolyl_cis-trans_isomerase;Peptidyl-prolyl cis-trans isomerase ppiB (EC 5.2.1.8);Peptidyl-prolyl cis-trans isomerase ppiB (EC 5.2.1.8)	0.509	0.0051581	18.193	0.0011314	0.0242332
0.0302034	0.57	2.75	SEED;Motility and Chemotaxis;Flagellar motility in Prokaryota;Flagellum_in_Campylobacter;Flagellar hook-basal body complex protein FliE;Flagellar hook-basal body complex protein FliE	0.53	0.0035862	18.2609	0.00109729	0.0242332
0.0302034	0.57	2.75	SEED;Motility and Chemotaxis;Flagellar motility in Prokaryota;Flagellum;Flagellar hook-basal body complex protein FliE;Flagellar hook-basal body complex protein FliE	0.53	0.0035862	18.2609	0.00109729	0.0242332
0.0628376	0.591	2.33	SEED;Miscellaneous;ZZ_gjo_need_homes;Cob(I)alamin adenosyltransferase fragment;Cob(I)alamin adenosyltransferase fragment	0.582	0.00136875	18.7221	0.000891144	0.0242332
